# Supplementary material
Source: Elsevier journal article supplement (https://www.sciencedirect.com/science/article/pii/S1134282X16301701)
Supplement: mmc1 [file S1134282X16301701:mmc1.doc]

Desde el comité de docencia querríamos conocer la situación actual de la docencia y de los profesionales implicados en ella para mejorar y dar respuesta a las necesidades reales de desarrollo de los profesionales de acuerdo con sus percepciones y expectativas. Su opinión nos interesa mucho y con ella podéis contribuir a mejorar la docencia que se ofrece en nuestro grupo.

Agradecemos por adelantado el tiempo que dediquéis y garantizamos la confidencialidad de los datos y que esta información se utilizará exclusivamente en gestión o investigación.

**A. DATOS SOCIODEMOGRÁFICOS**

| A.1. Sexo: | | Hombre | | | | Mujer | | | | | | | | | | | | | | | | | | |
| --- | --- | --- | --- | --- | --- | --- | --- | --- | --- | --- | --- | --- | --- | --- | --- | --- | --- | --- | --- | --- | --- | --- | --- | --- |
| A.2. Edad: | |  | | | | | | | | | | | | | | | | | | | | | | |
| A.3. Años de experiencia profesional: | | | | | | |  | | | | | | | | | | | | | | | | | |
| A.4. Formación académica: | | | | | | | Diplomado | | | | Licenciado | | | | | | Doctor | | | | | | | |
| A.5. Categoría profesional: | | | | | | | Enfermero/a | | | | Médico | | | | | | Otras | | | | | | | |
| A.6. Trabajo actual: | | | | Profesor universitario | | | | | | | | | | | | | | | | | | | | |
|  | | | | Tutor de residentes | | | | | | | | | | | | | | | | | | | | |
|  | | | | Colaborador docente | | | | | | | | | | | | | | | | | | | | |
|  | | | | Residente: | | | | | | Año de residencia: | | | | | | R1 | | R2 | R3 | | | R4 | R5 | |
|  | | | |  | | | | | | Años reglados de formación de mi especialidad: | | | | | | 1 | | 2 | 3 | | | 4 | 5 |  |
|  | | | | Sin faceta docente | | | | | | | | | | | | | | | | | | | | |
|  | | | | Otras facetas docentes | | | | | | | | | | | | | | | | | | | | |
| A.7. Centro de trabajo: | | | | | Hospital | | | Atención primaria | | | | | Sociosanitario | | | | | | | Otras | | | | |
| A.8. Tipo de especialidad: | | | | | Médica | | | Quirúrgica | | | | | Servicios centrales | | | | | | | Otras | | | | |
| A.9. Mi relación con la docencia: | | | | | | | | Recibo formación | | | | | | Imparto formación | | | | | | | Ambas | | | |
| A.10. Por favor, marque en cuales de las siguientes facetes se encuentra activo en la actualidad: | | | | | | | | | | | | | | | | | | | | | | | | |
|  | Asistencia | | Investigación | | | | | | Docencia | | | Gestión | | | Otras: | | | | | | | | | |

Respecto al desarrollo de cada una de las siguientes facetas, por favor, puntúe cuáles son sus posibilidades REALES actuales en su lugar de trabajo durante el último año.

Significado de la puntuación. Puntúe cada pregunta del 1 al 10:

Podría indicar cuáles son realmente sus posibilidades de desarrollar cada uno de los siguientes aspectos en su lugar de trabajo durante el último año?

| B.1 Asistencia: | 1 | 2 | 3 | 4 | 5 | 6 | 7 | 8 | 9 | 10 |
| --- | --- | --- | --- | --- | --- | --- | --- | --- | --- | --- |
| B.2 Docencia: | 1 | 2 | 3 | 4 | 5 | 6 | 7 | 8 | 9 | 10 |
| B.3 Investigación: | 1 | 2 | 3 | 4 | 5 | 6 | 7 | 8 | 9 | 10 |
| B.4 Gestión: | 1 | 2 | 3 | 4 | 5 | 6 | 7 | 8 | 9 | 10 |
| B.5 Equilibrio entre vida profesional y personal: | 1 | 2 | 3 | 4 | 5 | 6 | 7 | 8 | 9 | 10 |
| B.6 Contribución al beneficio de la sociedad: | 1 | 2 | 3 | 4 | 5 | 6 | 7 | 8 | 9 | 10 |
| B.7 Mi satisfacción global con mi trabajo: | 1 | 2 | 3 | 4 | 5 | 6 | 7 | 8 | 9 | 10 |

**C. POSIBILIDADES DE DESARROLLO EN EL LUGAR DE TRABAJO: FACTORES QUE INFLUYEN**

Conseguir el reto de formar los mejores profesionales precisa reflexionar sobre cuáles son los VALORES, las COMPETENCIAS y los RECURSOS más adecuados con lo que trabajamos. Indique, por favor, QUE PERCEPCIÓN TIENE, globalmente, DURANTE EL ÚLTIMO AÑO y en SU LUGAR DE TRABAJO sobre la POSIBILIDAD de poner en práctica los siguientes aspectos:

| C.1 Los **VALORES** que desarrolla en el día a día. |  |  |  |  |  |  |  |  |  |  |
| --- | --- | --- | --- | --- | --- | --- | --- | --- | --- | --- |
| C.1.1 Vocación hacia la profesión sanitaria: | 1 | 2 | 3 | 4 | 5 | 6 | 7 | 8 | 9 | 10 |
| C.1.2 Altruismo o procurar el bien de los demás,  incluso a costa del propio: | 1 | 2 | 3 | 4 | 5 | 6 | 7 | 8 | 9 | 10 |
| C.1.3 Priorizar a las personas en la toma de decisiones: | 1 | 2 | 3 | 4 | 5 | 6 | 7 | 8 | 9 | 10 |
| C.1.4 Dedicación al trabajo: | 1 | 2 | 3 | 4 | 5 | 6 | 7 | 8 | 9 | 10 |
| C.1.5 Interés por el aprendizaje continuo: | 1 | 2 | 3 | 4 | 5 | 6 | 7 | 8 | 9 | 10 |
| C.1.6 Responsabilidad u obligación moral de cumplir con el propio trabajo: | 1 | 2 | 3 | 4 | 5 | 6 | 7 | 8 | 9 | 10 |
| C.1.7 Respecto del principio de autonomía del paciente: | 1 | 2 | 3 | 4 | 5 | 6 | 7 | 8 | 9 | 10 |
| C.1.8 Respecto hacia el equipo de profesionales sanitarios con los que trabajáis: | 1 | 2 | 3 | 4 | 5 | 6 | 7 | 8 | 9 | 10 |
| C.1.9 Integridad y ética en la práctica profesional: | 1 | 2 | 3 | 4 | 5 | 6 | 7 | 8 | 9 | 10 |
| C.1.10 Capacidad de autogestión como profesional: | 1 | 2 | 3 | 4 | 5 | 6 | 7 | 8 | 9 | 10 |

| C.2 Sus **COMPETÈNCIAS** básicas como profesionales sanitarios: |  |  |  |  |  |  |  |  |  |  |
| --- | --- | --- | --- | --- | --- | --- | --- | --- | --- | --- |
| C.2.1 Conocimientos teóricos médicos y sanitarios: | 1 | 2 | 3 | 4 | 5 | 6 | 7 | 8 | 9 | 10 |
| C.2.2 Aplicación práctica de los conocimientos teóricos médicos y sanitarios: | 1 | 2 | 3 | 4 | 5 | 6 | 7 | 8 | 9 | 10 |
| C.2.3 Metodología docente y/o formación docente de que disponéis: | 1 | 2 | 3 | 4 | 5 | 6 | 7 | 8 | 9 | 10 |
| C.2.4 Habilidades específicas docentes que aplicáis en la práctica: | 1 | 2 | 3 | 4 | 5 | 6 | 7 | 8 | 9 | 10 |
| C.2.5 Iniciativa y proactividad: | 1 | 2 | 3 | 4 | 5 | 6 | 7 | 8 | 9 | 10 |
| C.2.6 Capacidad para tomar decisiones de forma autónoma: | 1 | 2 | 3 | 4 | 5 | 6 | 7 | 8 | 9 | 10 |
| C.2.7 Utilización eficiente de los recursos disponibles: | 1 | 2 | 3 | 4 | 5 | 6 | 7 | 8 | 9 | 10 |
| C.2.8 Comunicación con pacientes y familiares: | 1 | 2 | 3 | 4 | 5 | 6 | 7 | 8 | 9 | 10 |
| C.2.9 Trabajo en equipo con los otros profesionales sanitarios: | 1 | 2 | 3 | 4 | 5 | 6 | 7 | 8 | 9 | 10 |
| C.2.10 Capacidad de influencia sobre su entorno profesional: | 1 | 2 | 3 | 4 | 5 | 6 | 7 | 8 | 9 | 10 |
| C.2.11 Adaptación y flexibilidad al cambio: | 1 | 2 | 3 | 4 | 5 | 6 | 7 | 8 | 9 | 10 |
| C.2.12 Capacidad de liderazgo o "motor propio" para motivar a otros: | 1 | 2 | 3 | 4 | 5 | 6 | 7 | 8 | 9 | 10 |
| C.2.13 Capacidad de liderazgo o "motor propio" para motivarse a uno mismo: | 1 | 2 | 3 | 4 | 5 | 6 | 7 | 8 | 9 | 10 |
| C.2.14 Capacidad de liderazgo global: | 1 | 2 | 3 | 4 | 5 | 6 | 7 | 8 | 9 | 10 |
| C.2.15 Visión sistémica de la organización: | 1 | 2 | 3 | 4 | 5 | 6 | 7 | 8 | 9 | 10 |
|  |  |  |  |  |  |  |  |  |  |  |
| C.3 Los **RECURSOS** de que disponéis: |  |  |  |  |  |  |  |  |  |  |
| C.3.1 Disponibilidad de mentores, maestros o modelos de aprendizaje (persona con más experiencia que facilita vuestro desarrollo profesional): | 1 | 2 | 3 | 4 | 5 | 6 | 7 | 8 | 9 | 10 |
| C.3.2 Posibilidades de desarrollo profesional: | 1 | 2 | 3 | 4 | 5 | 6 | 7 | 8 | 9 | 10 |
| C.3.3 Dotación de infraestructuras para la formación: | 1 | 2 | 3 | 4 | 5 | 6 | 7 | 8 | 9 | 10 |
| C.3.4 Dotación de tecnología para la formación: | 1 | 2 | 3 | 4 | 5 | 6 | 7 | 8 | 9 | 10 |

**D. SUGERENCIAS**

| Comentad, por favor, otros aspectos que echéis de menos en este cuestionario o indicad en que consideráis que se debería mejorar ¿Qué otros temas o aspectos relacionados con la docencia podrían tener interés? |
| --- |

**E. ¿Está interesado en recibir información sobre los resultados de este cuestionario?**

Sí  No

Por favor, aunque haya dejado algún apartado sin responder le agradeceríamos que entregue el cuestionario. Muchas gracias.
